# Supplementary material
Source: publisher site journal article supplement (https://www.dovepress.com/get_supplementary_file.php?f=396290.docx)
Supplement: Supplementary file 1 [file get_supplementary_file.php]

**SUPPLEMENTARY MATERIAL**

Table S1. Equipotent doses of antihypertensive and lipid modifying agents43,44.

| Agents acting on the renin-angiotensin system | | |
| --- | --- | --- |
| Reference | Equivalence | |
| Ramipril | Enalapril | Valsartan |
| 2.5 mg | 5 mg | 40 mg |
| 5 mg | 10 mg | 80 mg |
| 10 mg | 20 mg | 160 mg |
| Lipid modifying agents | | |
| Reference | Equivalence | |
| Atorvastatin | Simvastatin | Rosuvastatin |
| 20 mg | 40 mg | 5 mg |
| 40 mg | 80 mg | 10 mg |

Table S2. Baseline characteristics of the study population before the propensity score matching.

|  | CNIC-Polypill | Monocomponents | Equipotent | Other therapies | Total | p |
| --- | --- | --- | --- | --- | --- | --- |
| Number of patients | 1,614 | 2,475 | 2,193 | 2,664 | 8,946 |
| *Demographic characteristics* |  |  |  |  |  |  |
| Age mean, years | 63.5 (11.2) | 62.4 (12.0) | 63.7 (13.2) | 62.7 (14.6) | 63.0 (13.0) | 0.002 |
| Gender (male) | 60.5% | 61.9% | 61.1% | 61.4% | 61.3% | 0.843 |
| *Comorbidities* |  |  |  |  |  |  |
| Arterial hypertension | 64.1% | 65.4% | 64.3% | 66.1% | 65.1% | 0.477 |
| Diabetes mellitus | 26.8% | 26.3% | 27.5% | 28.2% | 27.2% | 0.446 |
| Obesity | 16.5% | 14.6% | 16.9% | 15.8% | 15.9% | 0.167 |
| Smoking | 15.4% | 17.5% | 15.0% | 15.1% | 15.8% | 0.057 |
| Heart failure | 10.4% | 13.5% | 12.1% | 11.9% | 12.1% | 0.027 |
| Renal failure | 12.6% | 12.6% | 10.8% | 13.0% | 12.3% | 0.105 |
| Thromboembolism | 2.5% | 2.2% | 2.3% | 2.1% | 2.3% | 0.902 |
| *Cardiovascular events* |  |  |  |  |  |  |
| Coronary heart disease | 69.5% | 66.0% | 67.2% | 70.4% | 68.2% |  |
| Cerebrovascular disease | 21.9% | 23.8% | 23.0% | 19.5% | 22.0% |  |
| Peripheral artery disease | 8.7% | 10.2% | 9.8% | 10.1% | 9.8% | 0.004 |
| Previous events | 1.1 (0.3) | 1.1 (0.3) | 1.2 (0.4) | 1.1 (0.3) | 1.1 (0.3) | <0.001 |
| *Comorbidities: general* |  |  |  |  |  |  |
| Charlson index, mean | 2.1 (1.0) | 2.1 (1.0) | 2.2 (1.0) | 2.1 (1.0) | 2.1 (1.0) | 0.475 |
| Time from diagnosis, days | 324.1 (176) | 261.4 (125.6) | 270.6 (119.1) | 276.9 (159.4) | 279.6 (146.5) | <0.001 |
| Median (P25 - P75) | 297 (181 - 430) | 262 (154 - 371) | 269 (169 - 374) | 274 (137 - 417) | 274 (159 391) |  |
| *Drugs (ATC codes)* |  |  |  |  |  |  |
| Antithrombotic agents (B01) | 100.0% | 100.0% | 100.0% | 85.6% | 95.7% | <0.001 |
| Antihypertensives (C02) | 51.2% | 49.9% | 43.5% | 32.9% | 43.5% | 0.001 |
| Lipid modifying agents (C10) | 100.0% | 100.0% | 100.0% | 87.8% | 96.4% | <0.001 |
| Insulins (A10A) | 5.7% | 3.9% | 4.7% | 2.9% | 4.1% | <0.001 |
| Blood glucose lowering drugs (A10B) | 23.6% | 24.6% | 23.9% | 21.9% | 23.5% | 0.132 |
| Cardiac therapy (C01) | 8.8% | 10.2% | 11.6% | 10.4% | 10.4% | 0.050 |
| Diuretics (C03) | 19.4% | 18.9% | 17.3% | 16.0% | 17.7% | 0.010 |
| BBA/CCB (C07 and C08) | 51.6% | 50.0% | 40.5% | 44.3% | 46.3% | <0.001 |
| Agents acting on the RAS (C09) | 100.0% | 100.0% | 100.0% | 80.7% | 94.3% | <0.001 |
| Number of drugs, mean | 4.6 (1.2) | 4.6 (1.3) | 4.4 (1.3) | 3.8 (1.4) | 4.3 (1.3) | <0.001 |
| *Other parameters* |  |  |  |  |  |  |
| Total cholesterol, mg/dL | 229.4 (48.9) | 230.7 (51.4) | 238.9 (47.3) | 237.6 (45.7) | 234.5 (48.4) | <0.001 |
| LDL, mg/dL | 128.1 (41.1) | 129.6 (43.4) | 131.7 (40.4) | 130.4 (39.7) | 130.1 (41.2) | 0.049 |
| HDL, mg/dL | 48.9 (12.0) | 47.5 (12.4) | 49.2 (13.2) | 49.2 (13.3) | 48.7 (12.9) | <0.001 |
| Triglycerides, mg/dL | 235.8 (104.8) | 236.7 (105.8) | 234.3 (93.7) | 237.3 (98.9) | 236.1 (100.7) | 0.763 |

Values expressed as a percentage or mean (SD) or median (P25-P75).

ATC: Anatomical Chemical Therapeutic Classification System; BBA: beta blocking agents; CCB: calcium channel blockers; HDL: high-density lipoprotein cholesterol; LDL: low-density lipoprotein cholesterol; p statistical significance; P: percentiles; RAS: renin-angiotensin system; SD: standard deviation.

Table S3. Baseline characteristics of the study population after the propensity score matching.

|  | CNIC-Polypill | Monocomponents | Equipotent | Other therapies | p | SC |
| --- | --- | --- | --- | --- | --- | --- |
| Number of patients | 1,614 | 1,614 | 1,614 | 1,614 |
| *Demographic characteristics* |  |  |  |  |  |  |
| Age, mean, years | 63.5 (11.2) | 63.1 (12.0) | 63.5 (13.1) | 63.0 (13.9) | 0.550 | 0.036 |
| Gender (male) | 60.5% | 60.3% | 60.3% | 60.6% | 0.998 | 0.002 |
| *Comorbidities* |  |  |  |  |  |  |
| Arterial hypertension | 64.1% | 64.9% | 64.6% | 64.1% | 0.951 | 0.007 |
| Diabetes mellitus | 26.8% | 26.3% | 26.5% | 26.1% | 0.982 | 0.005 |
| Obesity | 16.5% | 16.1% | 16.5% | 16.1% | 0.974 | 0.006 |
| Smoking | 15.4% | 15.8% | 15.4% | 15.6% | 0.983 | 0.005 |
| Heart failure | 10.4% | 10.8% | 10.7% | 10.2% | 0.935 | 0.008 |
| Renal failure | 12.6% | 12.6% | 11.8% | 12.0% | 0.847 | 0.009 |
| Thromboembolism | 2.5% | 2.5% | 2.4% | 2.5% | 0.999 | 0.002 |
| *Cardiovascular events* |  |  |  |  |  |  |
| Coronary heart disease | 69.5% | 66.9% | 68.2% | 69.2% |  |  |
| Cerebrovascular disease | 21.9% | 23.9% | 21.7% | 20.7% |  |  |
| Peripheral artery disease | 8.7% | 9.2% | 10.0% | 10.2% | 0.153 | 0.031 |
| Previous events | 1.1 (0.3) | 1.1 (0.3) | 1.1 (0.4) | 1.1 (0.3) | 0.264 | 0.082 |
| *Comorbidities: general* |  |  |  |  |  |  |
| Charlson index, mean | 2.1 (1) | 2.1 (1) | 2.1 (1) | 2.1 (1) | 0.875 | 0.007 |

Values expressed as a percentage or mean (SD).

HDL: high-density lipoprotein cholesterol; LDL: low-density lipoprotein cholesterol; p statistical significance; P: percentiles; SC: standardized coefficients; SD: standard deviation.

Table S4. Drugs at baseline and treatment persistence during follow-up period.

|  | CNIC-Polypill | Monocomponents | Equipotent | Other therapies | p | SC |
| --- | --- | --- | --- | --- | --- | --- |
| Number of patients | 1,614 | 1,614 | 1,614 | 1,614 |
| *Drugs (ATC codes)* |  |  |  |  |  |  |
| Antithrombotic agents (B01) | 100.0% | 100.0% | 100.0% | 92.6% | <0.001 | 0.238 |
| Antihypertensives (C02) | 51.2% | 51.1% | 51.7% | 51.5% | 0.986 | 0.005 |
| Lipid modifying agents (C10) | 100.0% | 100.0% | 100.0% | 93.1% | <0.001 | 0.230 |
| Insulins (A10A) | 5.7% | 5.6% | 5.6% | 5.3% | 0.957 | 0.007 |
| Blood glucose lowering drugs (C10) | 23.6% | 24.5% | 24.0% | 23.7% | 0.935 | 0.008 |
| Cardiac therapy (C01) | 8.8% | 9.4% | 9.1% | 9.2% | 0.944 | 0.008 |
| Diuretics (C03) | 19.4% | 18.9% | 18.6% | 18.5% | 0.909 | 0.009 |
| BBA/CCB (C07/C08) | 51.6% | 50.7% | 51.7% | 51.7% | 0.935 | 0.008 |
| Agents acting on the RAS (C09) | 100.0% | 100.0% | 100.0% | 87.7% | <0.001 | 0.309 |
| Number of drugs, mean | 4.6 (1.2) | 4.6 (1.3) | 4.6 (1.2) | 4.5 (1.4) | 0.255 | 0.057 |
| *Other endpoints* |  |  |  |  |  |  |
| Time to cardiovascular event, days | 324.1 (176) | 258.6 (127.2) | 269.5 (119.9) | 274.2 (161) | <0.001 | 0.257 |
| - Median (P25 - P75) | 297 (181 - 430) | 255 (151 - 369) | 268 (166 - 374) | 271 (130 - 417) |  |  |
| Treatment duration, days | 627 (197.2) | 596.2 (211.7) | 590.2 (213) | 573.3 (216.8) | <0.001 | 0.188 |
| - Median (P25 - P75) | 730 (633 - 790) | 730 (501 - 730) | 730 (479 - 730) | 730 (418 - 730) |  |  |
| *Treatment persistence* |  |  |  |  |  |  |
| 2 years | 72.1% | 62.2% | 60.0% | 54.2% | <0.001 | 0.133 |
| - 95% CI | 69.9 - 74.3% | 58.8 - 64.6% | 59.6 - 64.4% | 51.8 - 56.6% |  |  |
| *Discontinuation (n, %)* | 451 (27.9%) | 610 (37.8%) | 646 (40.0%) | 739 (45.8%) | <0.001 | 0.138 |

Values expressed as a percentage or mean (SD) or median (P25-P75).

ATC: Anatomical Chemical Therapeutic Classification System; BBA: beta blocking agents; CCB: calcium channel blockers; IC: confidence interval; p statistical significance; P: percentiles; RAS: renin-angiotensin system; SC: standardized coefficients; SD: standard deviation.

Table S5. Cardiovascular events and deaths during the follow-up period.

|  | CNIC-Polypill | Monocomponents | Equipotent | Other therapies | p |
| --- | --- | --- | --- | --- | --- |
| Number of patients | 1,614 | 1,614 | 1,614 | 1,614 |
| ***Cardiovascular events*** |  |  |  |  |  |
| Patients | 19.8% | 23.3% | 25.5% | 26.8% | <0.001 |
| 95% CI | 17.9 - 21.7% | 21.2 - 25.4% | 23.4 - 27.6% | 24.4 - 28.8% |  |
| Mean (SD) | 0.2 (0.4) | 0.2 (0.5) | 0.3 (0.5) | 0.3 (0.5) | <0.001 |
| ***Types of cardiovascular events*** | |  |  |  |  |
| *Coronary heart disease* | 8.7% | 10.7% | 12.0% | 12.9% | 0.001 |
| Acute myocardial infarction | 2.9% | 3.7% | 4.5% | 4.5% |  |
| Stable angina pectoris | 4.8% | 5.8% | 6.1% | 6.9% |  |
| Unstable angina pectoris | 1.0% | 1.2% | 1.3% | 1.6% | 0.157 |
| *Cerebrovascular disease* | 5.6% | 6.9% | 6.7% | 7.9% | 0.080 |
| Ischemic stroke | 5.0% | 6.1% | 5.6% | 6.8% |  |
| Transient ischemic attack | 0.7% | 0.8% | 1.1% | 1.1% | 0.536 |
| *Peripheral artery disease* | 7.0% | 7.2% | 8.7% | 8.0% | 0.256 |
| Intermittent claudication | 5.6% | 5.7% | 6.8% | 5.9% |  |
| Acute limb ischemia | 1.1% | 1.2% | 1.4% | 1.6% |  |
| Amputation and others | 0.3% | 0.3% | 0.5% | 0.4% | 0.889 |
| ***Cardiovascular-related deaths*** | 8.1% | 8.1% | 8.9% | 9.2% | 0.357 |
| 95% CI | 6.8 - 9.4% | 6.8 - 9.4% | 7.5 - 10.3% | 7.8 - 10.6% |  |
| Time to cardiovascular event |  |  |  |  |  |
| Mean (SD) | 274.8 (195.5) | 249.2 (201.5) | 226.4 (203.4) | 217.8 (184.5) | <0.001 |
| Median (P25 - P75) | 236 (107 - 413) | 204 (76 - 373) | 160 (50 - 351) | 173 (57 - 337) |  |
| Time to death |  |  |  |  |  |
| Mean (SD) | 406.3 (183) | 395.6 (203.6) | 387.2 (205.1) | 386.6 (196.1) | 0.828 |
| Median (P25 - P75) | 392 (246 - 568) | 322 (222 - 472) | 333 (188 - 461) | 367 (225 - 452) |  |

Values expressed as a percentage or mean (SD) or median (P25-P75).

CI: confidence intervals; p statistical significance; P: percentiles; SD: standard deviation.
